# Supplementary material
Source: Springer Nature journal article supplement (https://publikationen.ub.uni-frankfurt.de/opus4/files/6371/13058_2008_2198_MOESM5_ESM.pdf)
Supplement: MOESM5 [file 13058_2008_2198_MOESM5_ESM.pdf]

Detailed list of the 199 Affymetrix ProbeSets of the immune system related “metagene clusters” and their functional annotation.

| Metagene Cluster | Affy_ID     | Gene Symbol | Function / cell type        | Description                                                                                                                                                                                                                                                                                                                                                     |
|------------------|-------------|-------------|-----------------------------|-----------------------------------------------------------------------------------------------------------------------------------------------------------------------------------------------------------------------------------------------------------------------------------------------------------------------------------------------------------------|
| IgG              | 205267_at   | POU2AF1     | B cell transcription factor | oct-binding factor POU domain class 2 associating factor 1 oct-binding factor POU domain, class 2, associating factor 1                                                                                                                                                                                                                                         |
| IgG              | 209138_x_at | IGLC2       | Immunoglobulin              | rearranged immunoglobulin lambda light chain (hybridoma H210) anti-hepatitis A immunoglobulin lambda chain variable region constant region complementarity-determining regions d immunoglobulin lambda locus Ig lambda light chain; immunoglobulin                                                                                                              |
| IgG              | 209374_s_at | IGHM        | Immunoglobulin              | IgM heavy chain constant region (Ab63) immunoglobulin heavy constant mu                                                                                                                                                                                                                                                                                         |
| IgG              | 211430_s_at | IGH@        | Immunoglobulin              | immunoglobulin lambda heavy chain (hybridoma H210) anti-hepatitis A IgG variable region constant region complementarity-determining regions d immunoglobulin heavy constant gamma 3 (Gm marker) constant region; IgG1; immunoglobulin; lambda heavy chain; variable region immunoglobulin lambda heavy chain immunoglobulin heavy constant gamma 3 (G3m marker) |
| IgG              | 211633_x_at | IGHG1       | Immunoglobulin              | Ig rearranged H-chain V-region (C-D-JH4)d                                                                                                                                                                                                                                                                                                                       |
| IgG              | 211634_x_at | IGHM        | Immunoglobulin              | Ig rearranged H-chain V-region (C-D-JH6)d                                                                                                                                                                                                                                                                                                                       |
| IgG              | 211635_x_at | IGHG3       | Immunoglobulin              | Ig rearranged H-chain V-region (C-D-JH6)d                                                                                                                                                                                                                                                                                                                       |
| IgG              | 211637_x_at | LOC388078   | Immunoglobulin              | Ig rearranged gamma-chain V-DXP4-JH6cd                                                                                                                                                                                                                                                                                                                          |
| IgG              | 211639_x_at | IGHM        | Immunoglobulin              | oo67b04.s1 Ig rearranged gamma-chain V-DXP1-JH4bd Human anti-B cell autoantibody IgM heavy chain variable V-D-J region (VH4) gene clone E11 VH4-63 non-productive rearrangement EST                                                                                                                                                                             |
| IgG              | 211640_x_at | IGHG1       | Immunoglobulin              | Ig rearranged gamma-chain V-DK4-JH4bd                                                                                                                                                                                                                                                                                                                           |
| IgG              | 211641_x_at | IGHG1       | Immunoglobulin              | Ig VH-region gened                                                                                                                                                                                                                                                                                                                                              |
| IgG              | 211643_x_at | IGKC        | Immunoglobulin              | Ig rearranged kappa-chain gene V-J-regiond                                                                                                                                                                                                                                                                                                                      |
| IgG              | 211644_x_at | IGKC        | Immunoglobulin              | Ig rearranged kappa-chain gene V-J-regiond                                                                                                                                                                                                                                                                                                                      |
| IgG              | 211645_x_at | IGKC        | Immunoglobulin              | immunoglobulin kappa-chain VK-1 (IgK) d                                                                                                                                                                                                                                                                                                                         |
| IgG              | 211649_x_at | IGHG1       | Immunoglobulin              | wc37g12.x1 Ig rearranged mu-chain gene V-N-D-N-J-regiond integrin cytoplasmic domain-associated protein 1 EST                                                                                                                                                                                                                                                   |
| IgG              | 211650_x_at | IGHG1       | Immunoglobulin              | IgG heavy chain variable region (Vh26) Ig rearranged mu-chain gene VH3-D2110-JH2ds. polyreactiv Human rearranged immunoglobulin heavy chain mRNA partial cds IgG heavy chain variable region                                                                                                                                                                    |
| IgG              | 211798_x_at | IGLJ3       | Immunoglobulin              | rearranged immunoglobulin lambda light chain for single-chain antibodyd immunoglobulin lambda locus Ig lambda light chain; immunoglobulin immunoglobulin lambda joining 3                                                                                                                                                                                       |
| IgG              | 211868_x_at | IGHG1       | Immunoglobulin              | for single-chain antibodyds                                                                                                                                                                                                                                                                                                                                     |
| IgG              | 211881_x_at | IGLJ3       | Immunoglobulin              | rearranged immunoglobulin lambda light chain for VEGF single chain antibodyd immunoglobulin lambda locus Ig lambda light chain; immunoglobulin immunoglobulin lambda joining 3                                                                                                                                                                                  |
| IgG              | 211908_x_at | IGHG1       | Immunoglobulin              | IgG heavy chain variable region (Vh26) rearranged immunoglobulin heavy chain partial Human rearranged immunoglobulin heavy chain mRNA partial cds IgG heavy chain variable region                                                                                                                                                                               |
| IgG              | 213502_x_at | LOC91316    | Immunoglobulin              | wo05c02.x1 immunoglobulin lambda-like polypeptide 3                                                                                                                                                                                                                                                                                                             |
| IgG              | 214669_x_at | LOC440871   | Immunoglobulin              | Ig rearranged gamma chainV-J-C region and immunoglobulin kappa variable 3D-15 immunoglobulin kappa constant                                                                                                                                                                                                                                                     |
| IgG              | 214677_x_at | IGL@        | Immunoglobulin              | rearranged immunoglobulin lambda light chain rearranged immunoglobulin lambda light chain mRNA immunoglobulin lambda locus Ig lambda light chain; immunoglobulin immunoglobulin lambda joining 3                                                                                                                                                                |
| IgG              | 214768_x_at | IGKC        | Immunoglobulin              | active IgK chain from GM 607 V-kappa-2 region                                                                                                                                                                                                                                                                                                                   |
| IgG              | 214777_at   | IGKC        | Immunoglobulin              | rearranged gene for kappa immunoglobulin subgroup V kappa IV                                                                                                                                                                                                                                                                                                    |
| IgG              | 214836_x_at | IGKC        | Immunoglobulin              | Ig rearranged gamma chainV-J-C region and kappa-immunoglobulin germline pseudogene (Chr22.4) variable region (subgroup V kappa II) immunoglobulin kappa constant                                                                                                                                                                                                |
| IgG              | 214916_x_at | IGH@        | Immunoglobulin              | IgG heavy chain variable region (Vh26) rearranged immunoglobulin heavy chain ds IgG heavy chain variable region                                                                                                                                                                                                                                                 |
| IgG              | 214973_x_at | IGHD        | Immunoglobulin              | partial IGKV3 gene for immunoglobulin heavy chain V region case 2 cell E 172                                                                                                                                                                                                                                                                                    |
| IgG              | 215121_x_at | IGL@        | Immunoglobulin              | rearranged immunoglobulin lambda light chain immunoglobulin lambda locus Ig lambda light chain; immunoglobulin                                                                                                                                                                                                                                                  |
| IgG              | 215176_x_at | IGKC        | Immunoglobulin              | partial IGKV gene for immunoglobulin kappa chain variable region clone 30                                                                                                                                                                                                                                                                                       |
| IgG              | 215214_at   | IGLC2       | Immunoglobulin              | clone ASPBLL54 immunoglobulin lambda light chain VJ region clone ASPBLL54 immunoglobulin lambda light chain VJ region ds Homo sapiens clone ASPBLL54 immunoglobulin lambda light chain VJ region mRNA partial cds truncated protein immunoglobulin lambda light chain VJ region                                                                                 |
| IgG              | 215379_x_at | IGL@        | Immunoglobulin              | rearranged immunoglobulin lambda light chain immunoglobulin lambda joining 3 immunoglobulin lambda locus Ig lambda light chain; immunoglobulin                                                                                                                                                                                                                  |
| IgG              | 215946_x_at | IGLL1       | Immunoglobulin              | wo05c02.x1 DNA sequence from clone CTA-246H3 on chromosome 22 Contains the gene for IGLL1 (immunoglobulin lambda-like polypeptide 1 pre-B-cell specific) a pseudogene similar to LRP5 (Lipoprotein Receptor Related Protein.) ESTs Genomic markers (D22S. immunoglobulin lambda-like polypeptide 3                                                              |
| IgG              | 215949_x_at | IGHM        | Immunoglobulin              | HUMCSFGMA granulocyte-macrophage colony-stimulating factor (CSF1) gene colony stimulating factor 2 (granulocyte-macrophage) granulocyte-macrophage colony stimulating factor granulocyte-macrophage colony-stimulating factor                                                                                                                                   |
| IgG              | 216207_x_at | IGKV1D-13   | Immunoglobulin              | germ line pseudogeneimmunoglobulin kappa light chain leader peptide and variable region (subgroup V kappa I) immunoglobulin kappa variable 1-13 germ line; Ig light chain; immunoglobulin; pseudogene; signal peptide; variable region immunoglobulin kappa light chain subgroup V                                                                              |
| IgG              | 216365_x_at | IGLJ3       | Immunoglobulin              | clone bsmneg3-t7 immunoglobulin lambda light chain VJ region (IGL) ds                                                                                                                                                                                                                                                                                           |
| IgG              | 216401_x_at | - - -       | Immunoglobulin              | partial IGKV gene for immunoglobulin kappa chain variable region clone 38                                                                                                                                                                                                                                                                                       |
| IgG              | 216491_x_at | IGHM        | Immunoglobulin              | immunoglobulin heavy chain variable region (V4-31) gene immunoglobulin heavy chain variable region (V4-4) genesd Homo sapiens partial VH4-30 gene for rearranged immunoglobulin heavy chain variable region isolate case2-Ki67-158 Ig VH4 heavy chain immunoglobulin heavy chain variable region                                                                |
| IgG              | 216510_x_at | IGHG1       | Immunoglobulin              | IgG heavy chain variable region (Vh26) rearranged immunoglobulin heavy chain ds IgG heavy chain variable region                                                                                                                                                                                                                                                 |
| IgG              | 216557_x_at | IGHG1       | Immunoglobulin              | rearranged immunoglobulin heavy chain (A1VH3) gene                                                                                                                                                                                                                                                                                                              |
| IgG              | 216560_x_at | IGLC2       | Immunoglobulin              | immunoglobulin lambda gene locus DNA clone:84 immunoglobulin lambda variable 3-10                                                                                                                                                                                                                                                                               |
| IgG              | 216576_x_at | - - -       | Immunoglobulin              | isolate donor N clone N88K immunoglobulin kappa light chain variable region ds                                                                                                                                                                                                                                                                                  |
| IgG              | 216853_x_at | IGLJ3       | Immunoglobulin              | clone KM36 immunoglobulin light chain variable region ds                                                                                                                                                                                                                                                                                                        |

| Metagene Cluster | Affy_ID     | Gene Symbol | Function / cell type                 | Description                                                                                                                                                                                                                                                                                                                                                                                                                                           |
|------------------|-------------|-------------|--------------------------------------|-------------------------------------------------------------------------------------------------------------------------------------------------------------------------------------------------------------------------------------------------------------------------------------------------------------------------------------------------------------------------------------------------------------------------------------------------------|
| IgG              | 216984_x_at | IGLJ3       | Immunoglobulin                       | immunoglobulin (mAb59) light chain V region sequence immunoglobulin (mAb59) light chain V region partial sequence immunoglobulin light chain V region immunoglobulin light chain V-J region                                                                                                                                                                                                                                                           |
| IgG              | 217148_x_at | IGLC2       | Immunoglobulin                       | anti-streptococcal anti-myosin immunoglobulin lambda light chain variable region ds                                                                                                                                                                                                                                                                                                                                                                   |
| IgG              | 217157_x_at | IGKC        | Immunoglobulin                       | isolate donor N clone N8K immunoglobulin kappa light chain variable region ds                                                                                                                                                                                                                                                                                                                                                                         |
| IgG              | 217179_x_at | IGL@        | Immunoglobulin                       | (T1.1) for IG lambda light chain                                                                                                                                                                                                                                                                                                                                                                                                                      |
| IgG              | 217227_x_at | IGL@        | Immunoglobulin                       | for IgG lambda light chain V-J-C region (clone Tg11)                                                                                                                                                                                                                                                                                                                                                                                                  |
| IgG              | 217235_x_at | IGLJ3       | Immunoglobulin                       | immunoglobulin (mAb56) light chain V region partial sequence                                                                                                                                                                                                                                                                                                                                                                                          |
| IgG              | 217258_x_at | IGL         | Immunoglobulin                       | IgG lambda light chain V-J-C region (clone Tg14) clone ASMneg1-b3 immunoglobulin lambda chain VJ region (IGL) ds H.sapiens mRNA for IgG lambda light chain V-J-C region (clone Tg19) constant region; immunoglobulin; immunoglobulin lambda chain; immunoglobulin light chain; joining region; variable region immunoglobulin lambda light chain VJC region                                                                                           |
| IgG              | 217281_x_at | IGHG1       | Immunoglobulin                       | for immunoglobulin heavy chain variable region ID 3                                                                                                                                                                                                                                                                                                                                                                                                   |
| IgG              | 217378_x_at | LOC391427   | Immunoglobulin                       | V108 gene encoding an immunoglobulin kappa orph immunoglobulin kappa variable 1/OR2-108                                                                                                                                                                                                                                                                                                                                                               |
| IgG              | 217480_x_at | LOC339562   | Immunoglobulin                       | kappa-immunoglobulin germline pseudogene (cos118) variable region (subgroup V kappa I) kappa-immunoglobulin germline pseudogene (cos118) variable region (subgroup V kappa I) immunoglobulin kappa variable 1/OR15-118 C-region; V-region; immunoglobulin-kappa; immunoglobulin-kappa subgroup vk-1; orphon; pseudogene Ig kappa chain                                                                                                                |
| IgG              | 221651_x_at | IGKC        | Immunoglobulin                       | Ig rearranged gamma chain V-J-C region and Similar to immunoglobulin kappa constant clone MGC:124 immunoglobulin kappa constant                                                                                                                                                                                                                                                                                                                       |
| IgG              | 221671_x_at | IGKC        | Immunoglobulin                       | Ig rearranged gamma chain V-J-C region and Ig rearranged gamma chain V-J-C region and complete cd immunoglobulin kappa constant                                                                                                                                                                                                                                                                                                                       |
|                  |             |             |                                      |                                                                                                                                                                                                                                                                                                                                                                                                                                                       |
| HCK              | 201422_at   | IFI30       | IFN gamma response                   | HUMIIP gamma-interferon-inducible protein (IP-30) interferon gamma-inducible protein 30 interferon, gamma-inducible protein 30                                                                                                                                                                                                                                                                                                                        |
| HCK              | 201720_s_at | LAPTM5      | hematopoietic cells                  | lysosomal-associated multitransmembrane protein (LAPTM5) Lysosomal-associated multispinning membrane protein-5 Lysosomal-associated multispinning membrane protein-5                                                                                                                                                                                                                                                                                  |
| HCK              | 201721_s_at | LAPTM5      | hematopoietic cells                  | lysosomal-associated multitransmembrane protein (LAPTM5) Lysosomal-associated multispinning membrane protein-5 Lysosomal-associated multispinning membrane protein-5                                                                                                                                                                                                                                                                                  |
| HCK              | 202803_s_at | ITGB2       | subunit of complement receptors      | leukocyte adhesion protein (LFA-1 Mac-1 p150 95 family) beta subunit integrin beta 2 (antigen CD18 (p95) lymphocyte function-associated antigen 1 macrophage antigen 1 (mac-1) beta subunit) cell adhesion molecule; cell surface glycoprotein; glycoprotein; leukocyte adhesion protein leukocyte adhesion protein beta-subunit precursor integrin beta chain, beta 2 precursor integrin, beta 2 (antigen CD18 (p95), lymphocyte function-associated |
| HCK              | 202953_at   | C1QB        | complement system                    | C1q B-chain of complement system complement component 1 q subcomponent betapolypeptide precursor complement component 1 q subcomponent beta polypeptide complement component 1, q subcomponent, beta polypeptide                                                                                                                                                                                                                                      |
| HCK              | 203473_at   | SLCO2B1     | -                                    | KIAA0880 protein solute carrier family 21 (organic anion transporter) member 9 solute carrier family 21 (organic anion transporter), member 9                                                                                                                                                                                                                                                                                                         |
| HCK              | 203645_s_at | CD163       | macrophages                          | M130 antigen extracellular variant CD163 antigen antigen; antigen M130 M130 antigen extracellular variant                                                                                                                                                                                                                                                                                                                                             |
| HCK              | 204122_at   | TYROBP      | monocyte / myeloid / dendritic cells | zd27g05.s1 TYRO protein tyrosine kinase binding protein                                                                                                                                                                                                                                                                                                                                                                                               |
| HCK              | 204232_at   | FCER1G      | FCeR (mast cells, basophiles)        | Fc-epsilon-receptor gamma-chain Fc fragment of IgE high affinity I receptor for gamma polypeptide precursor Fc fragment of IgE high affinity I receptor for; gamma polypeptide Fc-epsilon-receptor gamma-chain protein Fc-epsilon-receptor gamma-chain protein precursor Fc fragment of IgE, high affinity I, receptor for, gamma polypeptide precursor Fc fragment of IgE, high affinity I, receptor for; gamma                                      |
| HCK              | 204588_s_at | SLC7A7      | -                                    | glycoprotein-associated amino acid transporter y+LAT1 solute carrier family 7 (cationic amino acid transporter y+ system) member 7 glycoprotein-associated amino acid transporter; y+LAT1 gene glycoprotein-associated amino acid transporter solute carrier family 7 (cationic amino acid transporter,                                                                                                                                               |
| HCK              | 205098_at   | CCR1        | macrophages                          | HM145 chemokine (C-C motif) receptor 1                                                                                                                                                                                                                                                                                                                                                                                                                |
| HCK              | 206715_at   | TFEC        | monocyte / myeloid / dendritic cells | TFEC isoform (or TFEC) transcription factor EC TFEC TFEC isoform (or TFEC)                                                                                                                                                                                                                                                                                                                                                                            |
| HCK              | 208018_s_at | HCK         | monocyte / myeloid / dendritic cells | hemopoietic cell protein-tyrosine kinase (HCK) gene clone lambda-a2 1a hemopoietic cell kinase                                                                                                                                                                                                                                                                                                                                                        |
| HCK              | 209949_at   | NCF2        | monocyte / myeloid / dendritic cells | neutrophil oxidase factor (p67-phox) Similar to neutrophil cytosolic factor 2 (65kD chronic granulomatous disease autosomal 2) clone MGC:22 neutrophil cytosolic factor 2 (65kD chronic granulomatous disease autosomal 2) neutrophil cytosolic factor 2 (65kD, chronic granulomatous                                                                                                                                                                 |
| HCK              | 210644_s_at | LAIR1       | myeloid / T / B cells                | leukocyte-associated Ig-like receptor-1 (LAIR-1) leukocyte-associated Ig-like receptor 1b d leukocyte-associated Ig-like receptor 1 membrane glycoprotein leukocyte-associated Ig-like receptor 1                                                                                                                                                                                                                                                     |
| HCK              | 210895_s_at | CD86        | B7-2 costimulatory molecule of APCs  | om19c02.s1 CTLA4 counter-receptor (B7-2) d ESTs CD86 antigen (CD28 antigen ligand 2, B7-2 antigen)                                                                                                                                                                                                                                                                                                                                                    |
| HCK              | 215049_x_at | CD163       | macrophages                          | M130 antigen cytoplasmic variant 2 for M130 antigen cytoplasmic variant CD163 antigen antigen; antigen M130 CD163 antigen                                                                                                                                                                                                                                                                                                                             |
| HCK              | 218232_at   | C1QA        | complement system                    | ws52e08.x1 complement component 1 q subcomponent alphapolypeptide precursor complement component 1 q subcomponent alpha polypeptide EST complement component 1, q subcomponent, alpha polypeptide                                                                                                                                                                                                                                                     |
| HCK              | 219607_s_at | MS4A4A      | -                                    | membrane-spanning 4-domains subfamily A member 4 membrane-spanning 4-domains, subfamily A, member 4                                                                                                                                                                                                                                                                                                                                                   |
| HCK              | 204959_at   | MNDA        | IFN gamma response                   | myeloid cell nuclear differentiation antigen myeloid cell nuclear differentiation antigen interferon response element; interferon stimulated gene; interferon-alpha; myeloid cell nuclear differentiation antigen myeloid cell nuclear differentiation antigen                                                                                                                                                                                        |
| HCK              | 209901_x_at | AIF1        | IFN gamma response                   | allograft inflammatory factor-1 (AIF-1) allograft-inflammatory factor-1 d allograft inflammatory factor 1 interferon gamma responsive transcript                                                                                                                                                                                                                                                                                                      |

| Metagene Cluster | Affy_ID     | Gene Symbol | Function / cell type                 | Description                                                                                                                                                                                                                                                                               |
|------------------|-------------|-------------|--------------------------------------|-------------------------------------------------------------------------------------------------------------------------------------------------------------------------------------------------------------------------------------------------------------------------------------------|
| HCK              | 210629_x_at | LST1        | monocyte / myeloid / dendritic cells | LST1cLST1 C splice variant LST1 cLST1A splice variantd DNA segment on chromosome 6 (unique) 49 expressed sequence cLST1/C splice variant DNA segment on chromosome 6 (unique) 49 expressed sequence lymphocyte antigen 117                                                                |
| HCK              | 211581_x_at | LST1        | monocyte / myeloid / dendritic cells | LST1cLST1 C splice variant LST1 cLST1E splice variantd DNA segment on chromosome 6 (unique) 49 expressed sequence cLST1/C splice variant DNA segment on chromosome 6 (unique) 49 expressed sequence lymphocyte antigen 117                                                                |
| HCK              | 211582_x_at | LST1        | monocyte / myeloid / dendritic cells | LST1cLST1 C splice variant LST1 cLST1C splice variantd DNA segment on chromosome 6 (unique) 49 expressed sequence cLST1/C splice variant DNA segment on chromosome 6 (unique) 49 expressed sequence lymphocyte antigen 117                                                                |
| HCK              | 213095_x_at | AIF1        | IFN gamma response                   | allograft inflammatory factor-1 (AIF-1) allograft inflammatory factor-1 splice variant G1 d allograft inflammatory factor 1 interferon gamma responsive transcript                                                                                                                        |
| HCK              | 213160_at   | DOCK2       | leucocytes                           | KIAA0209 gene for KIAA0209 gened dedicator of cyto-kinesis 2 KIAA0209 similar to a human major CRK-binding protein DOCK180.                                                                                                                                                               |
| HCK              | 213566_at   | RNASE6      | -                                    | qb47d08.x1 ribonuclease RNase A family k6 EST ribonuclease, RNase A family, k6                                                                                                                                                                                                            |
| HCK              | 214181_x_at | LST1        | monocyte / myeloid / dendritic cells | LST1cLST1 C splice variant lymphocyte antigen 117 DNA segment on chromosome 6 (unique) 49 expressed sequence cLST1/C splice variant DNA segment on chromosome 6 (unique) 49 expressed sequence                                                                                            |
| HCK              | 214574_x_at | LST1        | monocyte / myeloid / dendritic cells | LST1cLST1 C splice variant DNA segment on chromosome 6 (unique) 49 expressed sequence NK cell triggering receptor p30 DNA segment on chromosome 6 (unique) 49 expressed sequence cLST1/C splice variant DNA segment on chromosome 6 (unique) 49 expressed sequence lymphocyte antigen 117 |
| HCK              | 215051_x_at | AIF1        | IFN gamma response                   | allograft inflammatory factor-1 (AIF-1) allograft inflammatory factor 1 interferon gamma responsive transcript                                                                                                                                                                            |
| HCK              | 215633_x_at | LST1        | monocyte / myeloid / dendritic cells | LST1cLST1 C splice variant for LST-1N protein DNA segment on chromosome 6 (unique) 49 expressed sequence cLST1/C splice variant DNA segment on chromosome 6 (unique) 49 expressed sequence lymphocyte antigen 117                                                                         |
| HCK              | 219666_at   | MS4A6A      | -                                    | KAIA2674 membrane-spanning 4-domains, subfamily A, member 6A                                                                                                                                                                                                                              |
|                  |             |             |                                      |                                                                                                                                                                                                                                                                                           |
| MHC-II           | 201137_s_at | HLA-DPB1    | MHC II component                     | MHC class II lymphocyte antigen (HLA-DP) beta chain major histocompatibility complex class II DP beta 1 major histocompatibility complex, class II, DP beta 1                                                                                                                             |
| MHC-II           | 201858_s_at | PRG1        | -                                    | hematopoietic proteoglycan core protein secretory granule proteoglycan peptide core d proteoglycan 1 secretory granule haematopoietic proteoglycan core protein hematopoietic proteoglycan core protein (AA 1 - 158) proteoglycan 1, secretory granule                                    |
| MHC-II           | 202902_s_at | CTSS        | MHC II pathway peptidase             | wg62c06.x1 cathepsin S                                                                                                                                                                                                                                                                    |
| MHC-II           | 203932_at   | HLA-DMB     | MHC II component                     | HLA-DMB major histocompatibility complex class II DM beta major histocompatibility complex, class II, DM beta                                                                                                                                                                             |
| MHC-II           | 204670_x_at | HLA-DRB1    | MHC II component                     | MHC class II HLA-DR beta-1 (DR2.3) 5end major histocompatibility complex class II DR beta 5 major histocompatibility complex class II DR beta 1 major histocompatibility complex, class II, DR beta 5                                                                                     |
| MHC-II           | 205270_s_at | LCP2        | T-cell activation                    | 76 kDa tyrosine phosphoprotein SLP-76 lymphocyte cytosolic protein 2 (SH2 domain-containing leukocyte protein of 76kD)                                                                                                                                                                    |
| MHC-II           | 207238_s_at | PTPRC       | CD45 / leukocyte common antigen      | leukocyte common antigen (T200) protein tyrosine phosphatase receptor type C protein tyrosine phosphatase, receptor type, C                                                                                                                                                               |
| MHC-II           | 208306_x_at | HLA-DRB1    | MHC II component                     | MHC class II HLA-DR beta-1 (DR2.3) 5end major histocompatibility complex class II DR beta 4 major histocompatibility complex class II DR beta 1 major histocompatibility complex, class II, DR beta 4                                                                                     |
| MHC-II           | 208894_at   | HLA-DRA     | MHC II component                     | major histocompatibility complex class II DR alpha major histocompatibility complex, class II, DR alpha                                                                                                                                                                                   |
| MHC-II           | 209312_x_at | HLA-DRB1    | MHC II component                     | MHC class II HLA-DR beta-1 (DR2.3) 5end MHC class II antigen (HLA-DRB1) HLA-DRB1*PBL alleled major histocompatibility complex class II DR beta 1 major histocompatibility complex, class II, DR beta 1                                                                                    |
| MHC-II           | 209619_at   | CD74        | MHC II component                     | Ia-associated invariant gamma-chain gene CD74 antigen (invariant polypeptide of major histocompatibility complex class II antigen-associated) Ia-associated gamma chain; cell surface glycoprotein Ia-associated gamma chain cell surface glycoprotein                                    |
| MHC-II           | 210982_s_at | HLA-DRA     | MHC II component                     | major histocompatibility complex class II DR alpha                                                                                                                                                                                                                                        |
| MHC-II           | 211991_s_at | HLA-DPA1    | MHC II component                     | SB classII histocompatibility antigen alpha-chain for SB classII histocompatibility antigen alpha-chain major histocompatibility complex class II DP alpha 1 major histocompatibility complex, class II, DP alpha                                                                         |
| MHC-II           | 212671_s_at | HLA-DQA1    | MHC II component                     | ak41e04.s1 major histocompatibility complex class II DQ alpha 1 EST                                                                                                                                                                                                                       |
| MHC-II           | 215193_x_at | HLA-DRB1    | MHC II component                     | oc35c12.s1 for MHC class II antigen (HLA-DRB1 gene) DRB1*0402 allele ESTs                                                                                                                                                                                                                 |
| MHC-II           | 217478_s_at | HLA-DMA     | MHC II component                     | RING6 HLA class II alpha chain-like product major histocompatibility complex class II DM alpha HLA class II antigen HLA class II alpha chain-like major histocompatibility complex, class II, DM alpha                                                                                    |
|                  |             |             |                                      |                                                                                                                                                                                                                                                                                           |
| LCK              | 1405_i_at   | CCL5        | T-cell / NK-cell                     | small inducible cytokine A5 (RANTES)                                                                                                                                                                                                                                                      |
| LCK              | 204116_at   | IL2RG       | IL2-Receptor (T-, NK-, B-cells)      | HUMIL2RG interleukin 2 receptor gamma chain interleukin 2 receptor gamma (severe combined immunodeficiency) interleukin 2 receptor; interleukin 2 receptor gamma chain interleukin 2 receptor gamma chain interleukin 2 receptor, gamma (severe combined immunodeficiency)                |
| LCK              | 204118_at   | CD48        | T-cell / B-cell / NK-cell            | MEM-102 glycoprotein CD48 antigen (B-cell membrane protein) MEM-102 glycoprotein; leukocyte antigen CD48 antigen (B-cell membrane protein)                                                                                                                                                |
| LCK              | 204563_at   | SELL        | L-selectin (leukocyte homing)        | HUMLNHR lymph node homing receptor selectin L (lymphocyte adhesion molecule 1) lymph node homing receptor precursor selectin L                                                                                                                                                            |
| LCK              | 204655_at   | SCYA5       | T-cell specific (RANTES)             | HUMTCSM T cell-specific protein (RANTES) small inducible cytokine A5 (RANTES) Alu repeat; T-cell-specific protein T cell-specific protein precursor small inducible cytokine A5 (RANTES)                                                                                                  |

| Metagene Cluster | Affy_ID     | Gene Symbol | Function / cell type               | Description                                                                                                                                                                                                                                                                                                                                                                             |
|------------------|-------------|-------------|------------------------------------|-----------------------------------------------------------------------------------------------------------------------------------------------------------------------------------------------------------------------------------------------------------------------------------------------------------------------------------------------------------------------------------------|
| LCK              | 204891_s_at | LCK         | T-cell specific                    | T-lymphocyte specific protein tyrosine kinase p56lck (lck) aberrant lymphocyte-specific protein tyrosine kinase truncated form of T-lymphocyte-specific protein tyrosine kinase p56lck; this aberrant message encoding primarily the SH2 and SH3 domains of p56lck was observed by northern hybridization and PCR amplification in poly-A selected RNA from two human leukemic T p56lck |
| LCK              | 205488_at   | GZMA        | T-cell                             | Hanukah factor serine protease (HuHF) granzyme A (granzyme 1 cytotoxic T-lymphocyte-associated serine esterase 3) granzyme A (granzyme 1, cytotoxic T-lymphocyte-associated)                                                                                                                                                                                                            |
| LCK              | 205798_at   | IL7R        | IL7-Receptor                       | HUMIL7AA interleukin-7 receptor (IL-7) interleukin 7 receptor interleukin 7 receptor interleukin-7 receptor precursor interleukin 7 receptor                                                                                                                                                                                                                                            |
| LCK              | 205821_at   | KLRK1       | NK-cell                            | NKG2D gene exons 2-5 and joined and CDS DNA segment on chromosome 12 (unique) 2489 expressed sequence NKG2D gene; NKG2D gene DNA segment on chromosome 12 (unique) 2489 expressed sequence                                                                                                                                                                                              |
| LCK              | 205831_at   | CD2         | T-cell                             | T-cell surface antigen CD2 (T11) clone PB1 CD2 antigen (p50) sheep red blood cell receptor CD2 antigen (p50), sheep red blood cell receptor                                                                                                                                                                                                                                             |
| LCK              | 206118_at   | STAT4       | T-cell differentiation             | HUMSTAT4R STAT4 signal transducer and activator of transcription 4                                                                                                                                                                                                                                                                                                                      |
| LCK              | 206150_at   | TNFRSF7     | T-cell activation                  | T cell activation antigen (CD27) tumor necrosis factor receptor superfamily member 7 tumor necrosis factor receptor superfamily, member 7                                                                                                                                                                                                                                               |
| LCK              | 206181_at   | SLAMF1      | B-cell / T-cell                    | signaling lymphocytic activation molecule (SLAM) signaling lymphocytic activation molecule signaling lymphocytic activation molecule                                                                                                                                                                                                                                                    |
| LCK              | 206337_at   | CCR7        | T-cell / B-cell chemokine receptor | HUMEBI103 G protein-coupled receptor (EBI 1) gene exon 3 chemokine (C-C motif) receptor 7 G protein-coupled receptor                                                                                                                                                                                                                                                                    |
| LCK              | 206666_at   | GZMK        | CTL / NK-cell granzyme             | pre-granzyme 3 granzyme K (serine protease granzyme 3 tryptase II) granzyme K precursor granzyme K (serine protease, granzyme 3; tryptase II)                                                                                                                                                                                                                                           |
| LCK              | 206978_at   | CCR2        | monocyte chemokine receptor        | ccr2b (ccr2) ccr2a (ccr2) ccr5 (ccr5) and ccr6 (ccr6) genes and lactoferrin (lactoferrin) gene chemokine (C-C motif) receptor 2 chemokine (C-C motif) receptor-like 2                                                                                                                                                                                                                   |
| LCK              | 207339_s_at | LTB         | lymphotoxin, B-cell                | DNA cosmid clones TN62 and TN82 lymphotoxin beta (TNF superfamily member 3) (LTB) transcript variant Homo sapiens DNA cosmid clones TN62 and TN82 lymphotoxin beta (TNF superfamily, member 3)                                                                                                                                                                                          |
| LCK              | 209670_at   | TRA@        | T-cell receptor                    | HUMTCAXB T-cell receptor active alpha-chain from JM cell line T-cell receptor active alpha-chain from JM cell line D-region; J-region; T-cell receptor; V-region; antigen receptor T-cell receptor alpha-chain (VDJC) T cell receptor alpha locus                                                                                                                                       |
| LCK              | 209685_s_at | PRKCB1      | protein kinase C beta              | protein kinase C beta-II type (PRKCB1) d protein kinase C, beta 1                                                                                                                                                                                                                                                                                                                       |
| LCK              | 210031_at   | CD3Z        | T-cell receptor                    | T cell receptor zeta-chain T cell receptor zeta-chain d CD3Z antigen zeta polypeptide (TIT3 complex) T cell receptor zeta-chain T-cell receptor zeta chain precursor CD3Z antigen, zeta polypeptide (TIT3 complex)                                                                                                                                                                      |
| LCK              | 210116_at   | SH2D1A      | T-B-cell communication             | SH2D1A formerly known as DSHP SH2 domain protein 1A Duncan's disease (lymphoproliferative syndrome) SH2 domain protein 1A Duncan's disease (lymphoproliferative syndrome) SH2 domain protein 1A, Duncan's disease (lymphoproliferative)                                                                                                                                                 |
| LCK              | 210915_x_at | TRBC1       | T-cell receptor                    | T-cell specific protein T-cell receptor rearranged beta-chain V-region (V-D-J) d T cell receptor beta locus T-cell; unidentified reading frame T-cell receptor beta-chain                                                                                                                                                                                                               |
| LCK              | 211339_s_at | ITK         | T-cell specific kinase             | HUMTKTCS T cell-specific tyrosine kinase IL2-inducible T-cell kinase tyrosine kinase 2024-2555 unique domain; 2556-2708 SH3 domain; 2750-3044 Sh2 domain (binds phosphotyrosine-containing proteins); 3095-3884 kinase domain (phosphorylation of tyrosine residues); putative tyrosine kinase                                                                                          |
| LCK              | 211796_s_at | TRBC1       | T-cell receptor                    | T-cell specific protein T cell receptor beta chain (TCRBV13S1-TCRBJ2S1) d T cell receptor beta locus T-cell; unidentified reading frame T-cell receptor beta-chain                                                                                                                                                                                                                      |
| LCK              | 213193_x_at | TRBC1       | T-cell receptor                    | T-cell specific protein T cell receptor beta locus T-cell; unidentified reading frame T-cell receptor beta-chain                                                                                                                                                                                                                                                                        |
| LCK              | 213539_at   | CD3D        | T-cell receptor                    | o184h02.s1 CD3D antigen delta polypeptide (TIT3 complex) CD3D antigen, delta polypeptide (TIT3 complex)                                                                                                                                                                                                                                                                                 |
| LCK              | 218805_at   | GIMAP5      | immune cells                       | th95b11.x1 hypothetical protein FLJ11296 immune associated nucleotide 4 like 1 (mouse)                                                                                                                                                                                                                                                                                                  |
| LCK              | 219014_at   | PLAC8       | -                                  | z107e03.r1 hypothetical protein                                                                                                                                                                                                                                                                                                                                                         |
| LCK              | 219243_at   | GIMAP4      | immune cells                       | wg53b12.x1 hypothetical protein FLJ11110                                                                                                                                                                                                                                                                                                                                                |
| LCK              | 64064_at    | GIMAP5      | immune cells                       | th95b11.x1 hypothetical protein FLJ11296 likely homolog of mouse immunity-associated nucleotide                                                                                                                                                                                                                                                                                         |
| LCK              | 201859_at   | PRG1        | -                                  | hematopoietic proteoglycan core protein proteoglycan 1 secretory granule hematopoietic proteoglycan core protein hematopoietic proteoglycan core protein (AA 1 - 158) proteoglycan 1, secretory granule                                                                                                                                                                                 |
| LCK              | 202957_at   | HCLS1       | hematopoietic cells                | HS1 gene hematopoietic lineage cell specific protein hematopoietic cell-specific Lyn substrate 1 hematopoietic lineage cell specific protein; HS1 gene hematopoietic lineage cell protein (AA 1-486) hematopoietic cell-specific Lyn substrate 1                                                                                                                                        |
| LCK              | 203332_s_at | INPP5D      | hematopoietic cells                | HSU57650 SH2-containing inositol 5-phosphatase (hSHIP) inositol polyphosphate-5-phosphatase 145kD type II 5-inositol phosphatase SH2-containing inositol 5-phosphatase inositol polyphosphate-5-phosphatase, 145kD                                                                                                                                                                      |
| LCK              | 203416_at   | CD53        | T-cell / NK-cell                   | CD53 glycoprotein CD53 antigen                                                                                                                                                                                                                                                                                                                                                          |
| LCK              | 203761_at   | SLA         | T-cell receptor regulation         | D89077 Src-like adapter protein Src-like-adapter Src-like adapter protein Src-like-adapter                                                                                                                                                                                                                                                                                              |
| LCK              | 203879_at   | PIK3CD      | PI3-kinase                         | phosphatidylinositol 3-kinase catalytic subunit p110delta phosphatidylinositol 3-kinase catalytic subunit p110delta d phosphoinositide-3-kinase catalytic delta polypeptide PI-3 kinase catalytic subunit phosphatidylinositol 3-kinase catalytic subunit p110delta phosphoinositide-3-kinase, catalytic, delta polypeptide                                                             |
| LCK              | 204057_at   | IRF8        | interferon response                | oy66c05.x1 interferon consensus sequence binding protein 1                                                                                                                                                                                                                                                                                                                              |
| LCK              | 204220_at   | GMFG        | -                                  | za93f08.r1 glia maturation factor gamma EST glia maturation factor, gamma                                                                                                                                                                                                                                                                                                               |
| LCK              | 204834_at   | FGL2        | -                                  | tg73b09.x1 fibrinogen-like 2                                                                                                                                                                                                                                                                                                                                                            |
| LCK              | 204912_at   | IL10RA      | IL10-receptor, T-/NK-cells         | U00672 interleukin-10 receptor interleukin 10 receptor alpha interleukin-10 receptor interleukin 10 receptor, alpha                                                                                                                                                                                                                                                                     |

| Metagene Cluster | Affy_ID     | Gene Symbol | Function / cell type                      | Description                                                                                                                                                                                                                                                                                                                                                                                                                                                                                                                                                            |
|------------------|-------------|-------------|-------------------------------------------|------------------------------------------------------------------------------------------------------------------------------------------------------------------------------------------------------------------------------------------------------------------------------------------------------------------------------------------------------------------------------------------------------------------------------------------------------------------------------------------------------------------------------------------------------------------------|
| LCK              | 204923_at   | CXorf9      | -                                         | DNA sequence from clone 753P9 on chromosome Xq25-26.1. Contains the gene coding Aminopeptidase P (EC 3.4.11.9 XAA-Pro X-Pro DNA sequence from clone 753P9 on chromosome Xq25-26.1. Contains the gene coding for Aminopeptidase P (EC 3.4.11.9 XAA-ProX-ProProlineAminoacylproline Aminopeptidase) and a novel gene. Contains ESTs STSs GSSs and a gaaa repeat polymorphi hypothetical protein likely ortholog of mouse SH3 gene SLV                                                                                                                                    |
| LCK              | 205159_at   | CSF2RB      | subunit of GM-CSF- / IL3- / IL5- receptor | yj49e08.r1 colony stimulating factor 2 receptor beta low-affinity (granulocyte-macrophage) ESTs colony stimulating factor 2 receptor, beta, low-affinity                                                                                                                                                                                                                                                                                                                                                                                                               |
| LCK              | 205269_at   | LCP2        | T-cell activation                         | 76 kDa tyrosine phosphoprotein SLP-76 lymphocyte cytosolic protein 2 (SH2 domain-containing leukocyte protein of 76kD)                                                                                                                                                                                                                                                                                                                                                                                                                                                 |
| LCK              | 209083_at   | CORO1A      | leucocytes                                | actin binding protein p57 coronin-like protein (HCORO1) d coronin actin-binding protein 1A coronin, actin binding protein, 1A                                                                                                                                                                                                                                                                                                                                                                                                                                          |
| LCK              | 209734_at   | HEM1        | hematopoietic cells                       | membrane-associated protein (HEM-1) hematopoietic protein 1 clone MGC:22 membrane-associated protein hematopoietic protein 1                                                                                                                                                                                                                                                                                                                                                                                                                                           |
| LCK              | 209879_at   | SELPLG      | stimul. T-cells and myeloid cells         | P-selectin glycoprotein ligand (SELPLG) gene selectin P ligand selectin P ligand                                                                                                                                                                                                                                                                                                                                                                                                                                                                                       |
| LCK              | 211742_s_at | EVI2B       | lymphocytes                               | EVI2B3P gene exon and ecotropic viral integration site 2B clone MGC:145 ecotropic viral integration site 2B                                                                                                                                                                                                                                                                                                                                                                                                                                                            |
| LCK              | 212588_at   | PTPRC       | CD45 / leukocyte common antigen           | T200 leukocyte common antigen (CD45 LC-A) protein tyrosine phosphatase receptor type C protein tyrosine phosphatase, receptor type, C                                                                                                                                                                                                                                                                                                                                                                                                                                  |
| LCK              | 213603_s_at | RAC2        | leucocytes                                | zd37g06.r1 HSPC022 protein EST                                                                                                                                                                                                                                                                                                                                                                                                                                                                                                                                         |
| LCK              | 216250_s_at | LPXN        | hematopoietic cells                       | leupaxin laminin alpha 3 (nicein (150kD) kalinin (165kD) BM600 (150kD) epilegrin) leupaxin similar to paxillin leupaxin                                                                                                                                                                                                                                                                                                                                                                                                                                                |
| LCK              | 218870_at   | ARHGAP15    | Rho GAP                                   | nx93e05.s1 uncharacterized bone marrow protein BM046                                                                                                                                                                                                                                                                                                                                                                                                                                                                                                                   |
| LCK              | 220330_s_at | SAMSN1      | adaptor protein                           | wj28c05.x1 SAM domain SH3 domain and nuclear localisation signals 1 Homo sapiens chromosome 21 segment HS21C006 EST SAM domain, SH3 domain and nuclear localisation signals,                                                                                                                                                                                                                                                                                                                                                                                           |
| LCK              | 38149_at    | KIAA0053    | -                                         | KIAA0053 gene for KIAA0053 gene KIAA0053 gene product                                                                                                                                                                                                                                                                                                                                                                                                                                                                                                                  |
| MHC-I            | 204806_x_at | HLA-F       | MHC I component                           | te53h07.x1 major histocompatibility complex class I F EST major histocompatibility complex, class I, F                                                                                                                                                                                                                                                                                                                                                                                                                                                                 |
| MHC-I            | 208729_x_at | HLA-B       | MHC I component                           | wz58b02.x1 major histocompatibility complex class I B EST                                                                                                                                                                                                                                                                                                                                                                                                                                                                                                              |
| MHC-I            | 208812_x_at | HLA-B       | MHC I component                           | HLA class I locus C heavy chain major histocompatibility complex class I C clone MGC:110 major histocompatibility complex class I C histocompatibility antigen; HLA class I heavy chain; HLA class I locus C HLA class I heavy chain major histocompatibility complex, class I, C                                                                                                                                                                                                                                                                                      |
| MHC-I            | 209140_x_at | HLA-B       | MHC I component                           | wz58b02.x1 major histocompatibility complex class I B EST major histocompatibility complex, class I, B                                                                                                                                                                                                                                                                                                                                                                                                                                                                 |
| MHC-I            | 210514_x_at | HLA-G       | MHC I component                           | dJ377H14.1 (major histocompatibility complex class I G (HLA 6.0)) MHC class I antigen (HLA-G) HLA-G1 alleled HLA-G histocompatibility antigen, class I, G                                                                                                                                                                                                                                                                                                                                                                                                              |
| MHC-I            | 211528_x_at | HLA-G       | MHC I component                           | dJ377H14.1 (major histocompatibility complex class I G (HLA 6.0)) lymphocyte antigen (HLA-G2.2) d                                                                                                                                                                                                                                                                                                                                                                                                                                                                      |
| MHC-I            | 211529_x_at | HLA-G       | MHC I component                           | dJ377H14.1 (major histocompatibility complex class I G (HLA 6.0)) lymphocyte antigen (HLA-G2.1) d                                                                                                                                                                                                                                                                                                                                                                                                                                                                      |
| MHC-I            | 211799_x_at | HLA-A       | MHC I component                           | HLA class I heavy chain (HLA-Cw*1701) d                                                                                                                                                                                                                                                                                                                                                                                                                                                                                                                                |
| MHC-I            | 211911_x_at | HLA-B       | MHC I component                           | wz58b02.x1 major histocompatibility complex class I B EST                                                                                                                                                                                                                                                                                                                                                                                                                                                                                                              |
| MHC-I            | 213932_x_at | HLA-A       | MHC I component                           | HLA class-I (HLA-A26) heavy chain (clone cMIY-1) major histocompatibility complex class I A                                                                                                                                                                                                                                                                                                                                                                                                                                                                            |
| MHC-I            | 214459_x_at | HLA-C       | MHC I component                           | Cw1 antigen d                                                                                                                                                                                                                                                                                                                                                                                                                                                                                                                                                          |
| MHC-I            | 215313_x_at | HLA-A       | MHC I component                           | HLA class-I (HLA-A26) heavy chain (clone cMIY-1) major histocompatibility complex class I A                                                                                                                                                                                                                                                                                                                                                                                                                                                                            |
| MHC-I            | 216526_x_at | HLA-C       | MHC I component                           | HLA class I locus C heavy chain : FLJ21183 fis clone CAS11634 highly similar to HSHLACW07 for leukocyte antigen C alpha chain major histocompatibility complex class I C histocompatibility antigen; HLA class I heavy chain; HLA class I locus C HLA class I heavy chain                                                                                                                                                                                                                                                                                              |
| MHC-I            | 217436_x_at | HLA-J       | MHC I component                           | MHC class I HLA-J gene exons 1-8 and major histocompatibility complex class I J (pseudogene) MHC class I HLA-J antigen; cell surface antigen; cell surface glycoprotein; class I gene; inactive antigen; integral membrane protein; major histocompatibility complex heavy chain MHC class I HLA-J antigen major histocompatibility complex, class I, J (pseudogene)                                                                                                                                                                                                   |
| MHC-I            | 221875_x_at | HLA-F       | MHC I component                           | dJ377H14.9 (major histocompatibility complex class I F (CDA12)) major histocompatibility complex class I F HTG; 60S Ribosomal Protein 7A; 60S Ribosomal Protein L23A; CDA12; CpG Island; HCGIX; HLA-F; HLA-G; interferon-inducible protein 1-8U; major histocompatibility complex; MHC; MICB; P5-1; PERB11.1; RPL23A; RPL7A match: proteins: Sw:P17693 Sw:P30515 Tr:O78132 Tr:Q30716 Tr:Q30443 Tr:O62903 Tr:Q31016 Tr:Q30445 Tr:Q31012 Tr:Q31014 Tr:Q30719 Tr:Q30595 Sw:P30377 Tr:Q95483 Sw:P30517 dJ377H14.1 (major histocompatibility complex, class I, G (HLA 6.0)) |
| STAT1            | 200887_s_at | STAT1       | STAT signal transduction                  | transcription factor ISGF-3 signal transducer and activator of transcription 1 91kD transcription factor transcription factor ISGF-3 signal transducer and activator of transcription 1, 91kD                                                                                                                                                                                                                                                                                                                                                                          |
| STAT1            | 202269_x_at | GBP1        | interferon response                       | UI-H-BI0p-aaw-f-03-0-UI.s1 guanylate binding protein 1 interferon-inducible 67kD clone MGC:39 guanylate binding protein 1 interferon-inducible 67kD guanylate binding protein 1, interferon-inducible, 67kD                                                                                                                                                                                                                                                                                                                                                            |
| STAT1            | 202270_at   | GBP1        | interferon response                       | guanylate binding protein isoform I (GBP-2) guanylate binding protein 1 interferon-inducible 67kD guanylate binding protein isoform I guanylate binding protein 1, interferon-inducible, 67kD                                                                                                                                                                                                                                                                                                                                                                          |
| STAT1            | 202307_s_at | TAP1        | antigen processing                        | RING4 ATP-binding cassette sub-family B (MDRTAP) member 2 ATP-binding cassette sub-family B (MDR/TAP) member 2 transporter 1, ATP-binding cassette, sub-family B (MDR/TAP)                                                                                                                                                                                                                                                                                                                                                                                             |
| STAT1            | 202531_at   | IRF1        | STAT signal transduction                  | HUMIFNRF1A interferon regulatory factor 1 gene interferon regulatory factor 1                                                                                                                                                                                                                                                                                                                                                                                                                                                                                          |
| STAT1            | 203915_at   | CXCL9       | interferon response                       | Humig monokine induced by gamma interferon chemokine; cytokine; Humig gene; secreted protein monokine induced by gamma interferon                                                                                                                                                                                                                                                                                                                                                                                                                                      |
| STAT1            | 204279_at   | PSMB9       | antigen processing                        | nw16h03.s1 proteasome (prosome macropain) subunit beta type 9 (large multifunctional protease 2) proteasome (prosome, macropain) subunit, beta type, 9                                                                                                                                                                                                                                                                                                                                                                                                                 |

| Metagene Cluster | Affy_ID                    | Gene Symbol | Function / cell type     | Description                                                                                                                                                                                                                                                                                                                                                                                                                                                                                         |
|------------------|----------------------------|-------------|--------------------------|-----------------------------------------------------------------------------------------------------------------------------------------------------------------------------------------------------------------------------------------------------------------------------------------------------------------------------------------------------------------------------------------------------------------------------------------------------------------------------------------------------|
| STAT1            | 204533_at                  | CXCL10      | interferon response      | HSINFGGER gamma-interferon inducible early response gene (with homology to platelet proteins) small inducible cytokine subfamily B (Cys-X-Cys) member 10 small inducible cytokine subfamily B (Cys-X-Cys), member                                                                                                                                                                                                                                                                                   |
| STAT1            | 209969_s_at                | STAT1       | STAT signal transduction | transcription factor ISGF-3 sequence Similar to signal transducer and activator of transcription 1 91kD clone MGC:34 signal transducer and activator of transcription 1 91kD transcription factor                                                                                                                                                                                                                                                                                                   |
| STAT1            | 210029_at                  | INDO        | interferon response      | interferon-gamma-inducible indoleamine 2,3-dioxygenase (IDO) interferon-gamma-inducible indoleamine 2,3-dioxygenase (IDO) d indoleamine-pyrrole 2,3-dioxygenase indole 2,3-dioxygenase indoleamine 2,3-dioxygenase (IDO) (EC 1.13.11.17) indole 2,3-dioxygenase indoleamine-pyrrole 2,3-dioxygenase                                                                                                                                                                                                 |
| STAT1            | 210163_at                  | CXCL11      | interferon response      | interferon stimulated T-cell alpha chemoattractant precursor interferon stimulated T-cell alphachemoattractant precursor small inducible cytokine subfamily B (Cys-X-Cys) member 11 chemokine; I-TAC interferon stimulated T-cell alpha chemoattractant precursor                                                                                                                                                                                                                                   |
| STAT1            | 211122_s_at                | CXCL11      | interferon response      | interferon stimulated T-cell alpha chemoattractant precursor small inducible cytokine subfamily B (Cys-X-Cys) member 11 chemokine; I-TAC interferon stimulated T-cell alpha chemoattractant precursor small inducible cytokine subfamily B (Cys-X-Cys), member                                                                                                                                                                                                                                      |
| STAT1            | 219209_at                  | IFIH1       | interferon response      | zo23f04.s1 melanoma differentiation associated protein-5 accessory proteins BAP31/BAP29 EST                                                                                                                                                                                                                                                                                                                                                                                                         |
| STAT1            | AFFX-HUMISGF3A/M97935_3_at | - - -       | interferon response      | M97935 Homo sapiens transcription factor ISGF-3 mRNA, complete cds (_5, _MA, MB, _3 represent transcript regions 5 prime, MiddleA, MiddleB, and 3 prime respectively)                                                                                                                                                                                                                                                                                                                               |
|                  |                            |             |                          |                                                                                                                                                                                                                                                                                                                                                                                                                                                                                                     |
| Interferon       | 202086_at                  | MX1         | interferon inducible     | p78 protein myxovirus (influenza) resistance 1 homolog of murine (interferon-inducible protein p78) p78 protein p78 protein myxovirus (influenza) resistance 1, homolog of murine (interferon-inducible protein p78) myxovirus (influenza virus) resistance 1, interferon-inducible                                                                                                                                                                                                                 |
| Interferon       | 202411_at                  | IFI27       | interferon inducible     | HSP27 p27 interferon alpha-inducible protein 27 interferon, alpha-inducible protein 27                                                                                                                                                                                                                                                                                                                                                                                                              |
| Interferon       | 202869_at                  | OAS1        | interferon inducible     | (2'-5') oligo A synthetase E gene 2 5-oligoadenylate synthetase 1 (40-46 kD) (OAS1) transcript variant E 2',5'-oligoadenylate synthetase 1 (40-46 kD)                                                                                                                                                                                                                                                                                                                                               |
| Interferon       | 203153_at                  | IFIT1       | interferon inducible     | HUMII56KD interferon-inducible 56 Kd protein interferon-induced protein with tetratricopeptide repeats 1                                                                                                                                                                                                                                                                                                                                                                                            |
| Interferon       | 204415_at                  | G1P3        | interferon inducible     | HSU22970 interferon-inducible peptide (6-16) gene interferon alpha-inducible protein (clone IFI-6-16) (G1P3) transcript variant interferon alpha-inducible protein (clone IFI-6-16) gene 6-16; interferon; interferon-inducible; interferon stimulatory response element (ISRE); minisatellite; expressed minisatellite; alternative splicing alternatively spliced using the second alternative exon 2 interferon-inducible peptide precursor interferon, alpha-inducible protein (clone IFI-6-16) |
| Interferon       | 204439_at                  | IFI44L      | interferon inducible     | expressed in osteoblast hypothetical protein expressed in osteoblast GS3686 The submitters designated this product as GS3686 hypothetical protein, expressed in osteoblast                                                                                                                                                                                                                                                                                                                          |
| Interferon       | 204747_at                  | IFIT3       | interferon inducible     | CIG49 (cig49) interferon-induced protein with tetratricopeptide repeats 4                                                                                                                                                                                                                                                                                                                                                                                                                           |
| Interferon       | 204972_at                  | OAS2        | interferon inducible     | 71 kDa 25'' oligoadenylate synthetase (p69 2-5A synthetase) 2-5oligoadenylate synthetase 2 (OAS2) transcript variant 2'-5'oligoadenylate synthetase 2 2'-5'-oligoadenylate synthetase 2 (69-71 kD)                                                                                                                                                                                                                                                                                                  |
| Interferon       | 205483_s_at                | G1P2        | interferon inducible     | zx57e04.r1 interferon-stimulated protein 15 kDa interferon-stimulated protein, 15 kDa                                                                                                                                                                                                                                                                                                                                                                                                               |
| Interferon       | 205552_s_at                | OAS1        | interferon inducible     | 1.6Kb 2-5A synthetase induced by interferon 2 5-oligoadenylate synthetase 1 (40-46 kD) (OAS1) transcript variant E 2' 5'-oligoadenylate synthetase 1 2',5'-oligoadenylate synthetase 1 (40-46 kD)                                                                                                                                                                                                                                                                                                   |
| Interferon       | 213797_at                  | RSAD2       | interferon inducible     | cig5 sequence cig5 partial sequence                                                                                                                                                                                                                                                                                                                                                                                                                                                                 |
| Interferon       | 214453_s_at                | IFI44       | interferon inducible     | genehepatitis C-associated microtubular aggregate protein p44 interferon-induced hepatitis C-associated microtubular aggregate protein (44kD) hepatitis C-associated microtubular aggregate protein; p44 interferon-induced, hepatitis C-associated microtubular aggregate protein (44kD)                                                                                                                                                                                                           |
| Interferon       | 218400_at                  | OAS3        | interferon inducible     | 2-5oligoadenylate synthetase 3 2'-5'-oligoadenylate synthetase 3 (100 kD)                                                                                                                                                                                                                                                                                                                                                                                                                           |
| Interferon       | 218986_s_at                | FLJ20035    | -                        | DKFZp434E1722_s1 hypothetical protein FLJ20035 EST                                                                                                                                                                                                                                                                                                                                                                                                                                                  |
